# Supplementary material for: Notch controls urothelial integrity in the mouse bladder
Source: JCI journal article supplement (doi:10.1172/jci.insight.133232), 2020-02-12
Supplement: sd1 [file 1]

Supplemental Fig 1

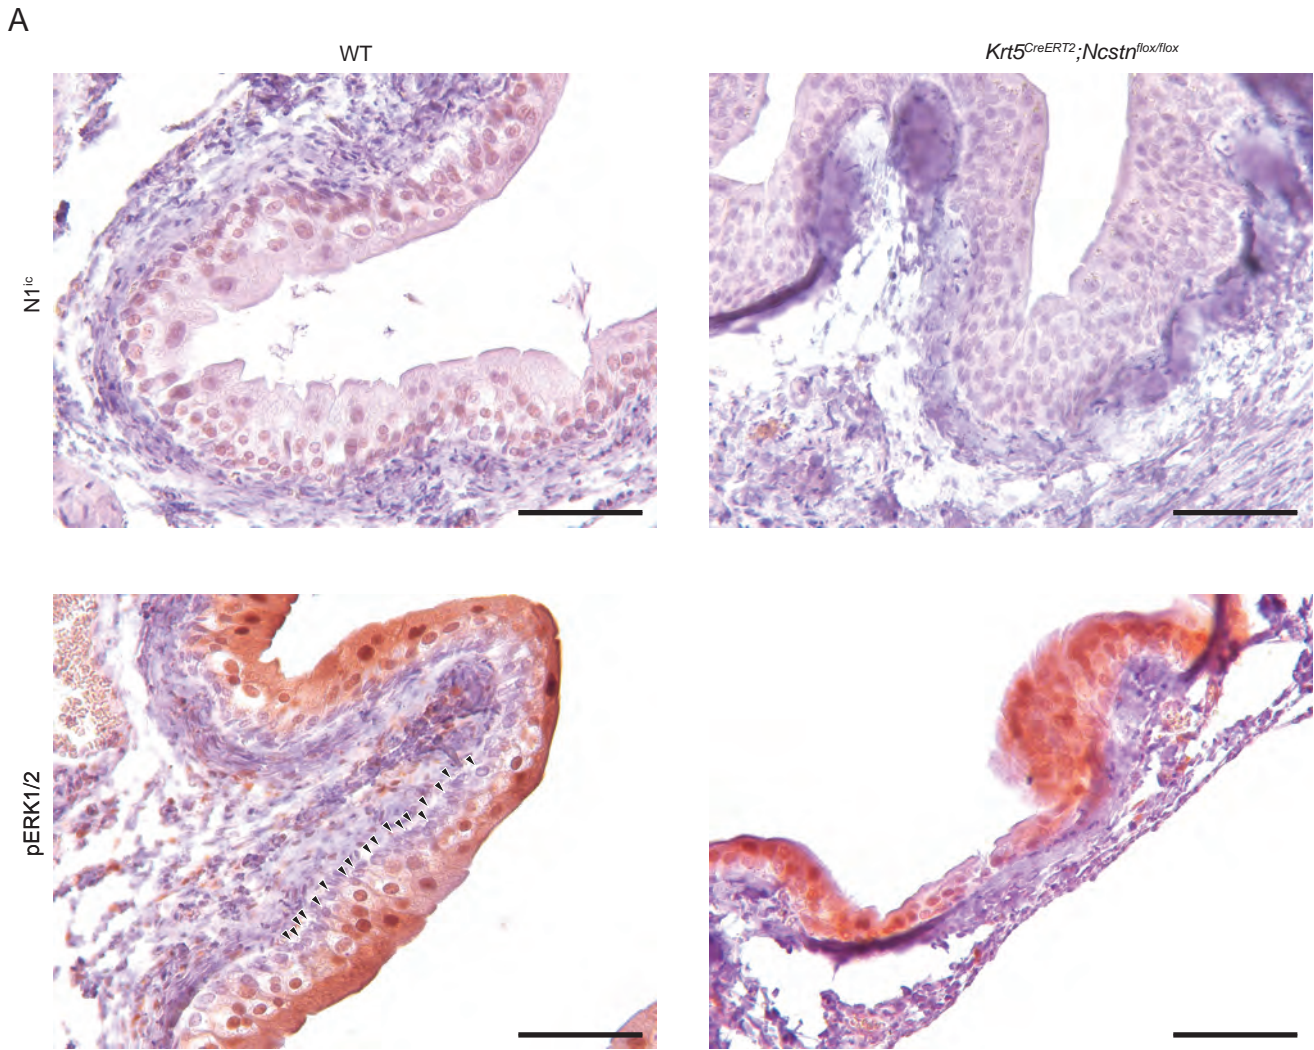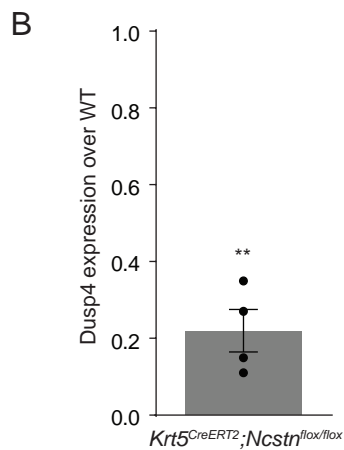

**Supplemental Fig 1. Genetic inactivation of the Notch pathway leads to loss of nuclear N1 signal and elevation of activated ERK1/2.** (A) Immunohistochemistry with antibodies against the nuclear form of NOTCH1 (N1ic; top) and phosphorylated ERK1/2 (pERK1/2; bottom) in WT and Notch deficient (in this case *Krt5<sup>CreERT2</sup>;Ncstn<sup>lox/lox</sup>*) mice. Note the obvious lack of intracellular NOTCH1 and pERK1/2 in basal cells (black arrowheads). Scale bars indicate 100  $\mu$ m. (B) Quantitative RT-PCR analysis of *Dusp4* from urothelial cell RNA of *Krt5<sup>CreERT2</sup>;Ncstn<sup>lox/lox</sup>* mice (n=4). Expression is presented as ratio over WT mice (n=4). \*\* indicates  $p < 0.01$ . Student's t test was used.

## Supplemental Fig 2

A

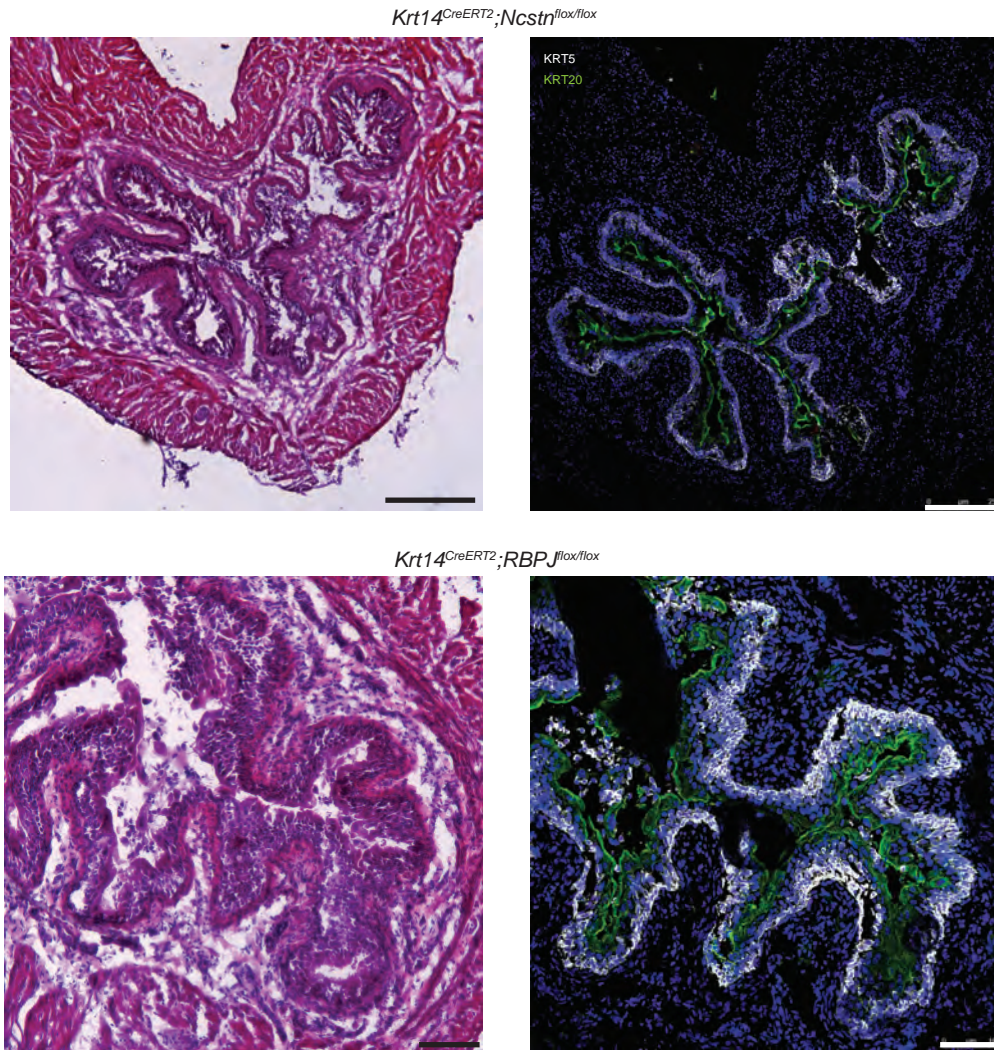

B

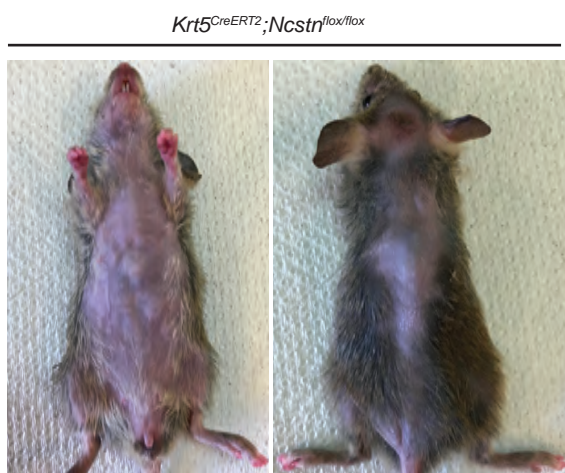

C

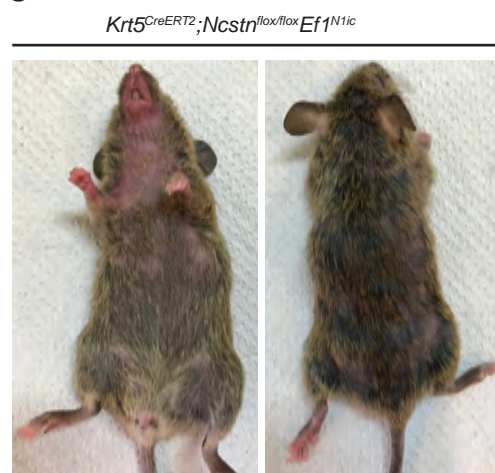

### Supplemental Fig 2. Genetic inactivation of the Notch pathway leads to bladder and skin abnormalities.

(A) H&E staining and immunofluorescence with the indicated antibodies on bladder sections from *Krt14<sup>CreERT2</sup>;Ncstn<sup>flx/flx</sup>* or *Krt14<sup>CreERT2</sup>;RBPJ<sup>flx/flx</sup>* mice. Scale bars indicate 250  $\mu$ m (top) and 100  $\mu$ m (bottom). Mice shown here do not carry the Tomato transgene. DAPI has been used as nuclear counterstain. (B) Images of *Krt5<sup>CreERT2</sup>;Ncstn<sup>flx/flx</sup>* mice indicating severe skin defects. (C) Images of *Krt5<sup>CreERT2</sup>;Ncstn<sup>flx/flx</sup>;Ef1<sup>N1ic</sup>* mice showing serious amelioration of the Notch loss-induced skin phenotype.

Supplemental Fig 3

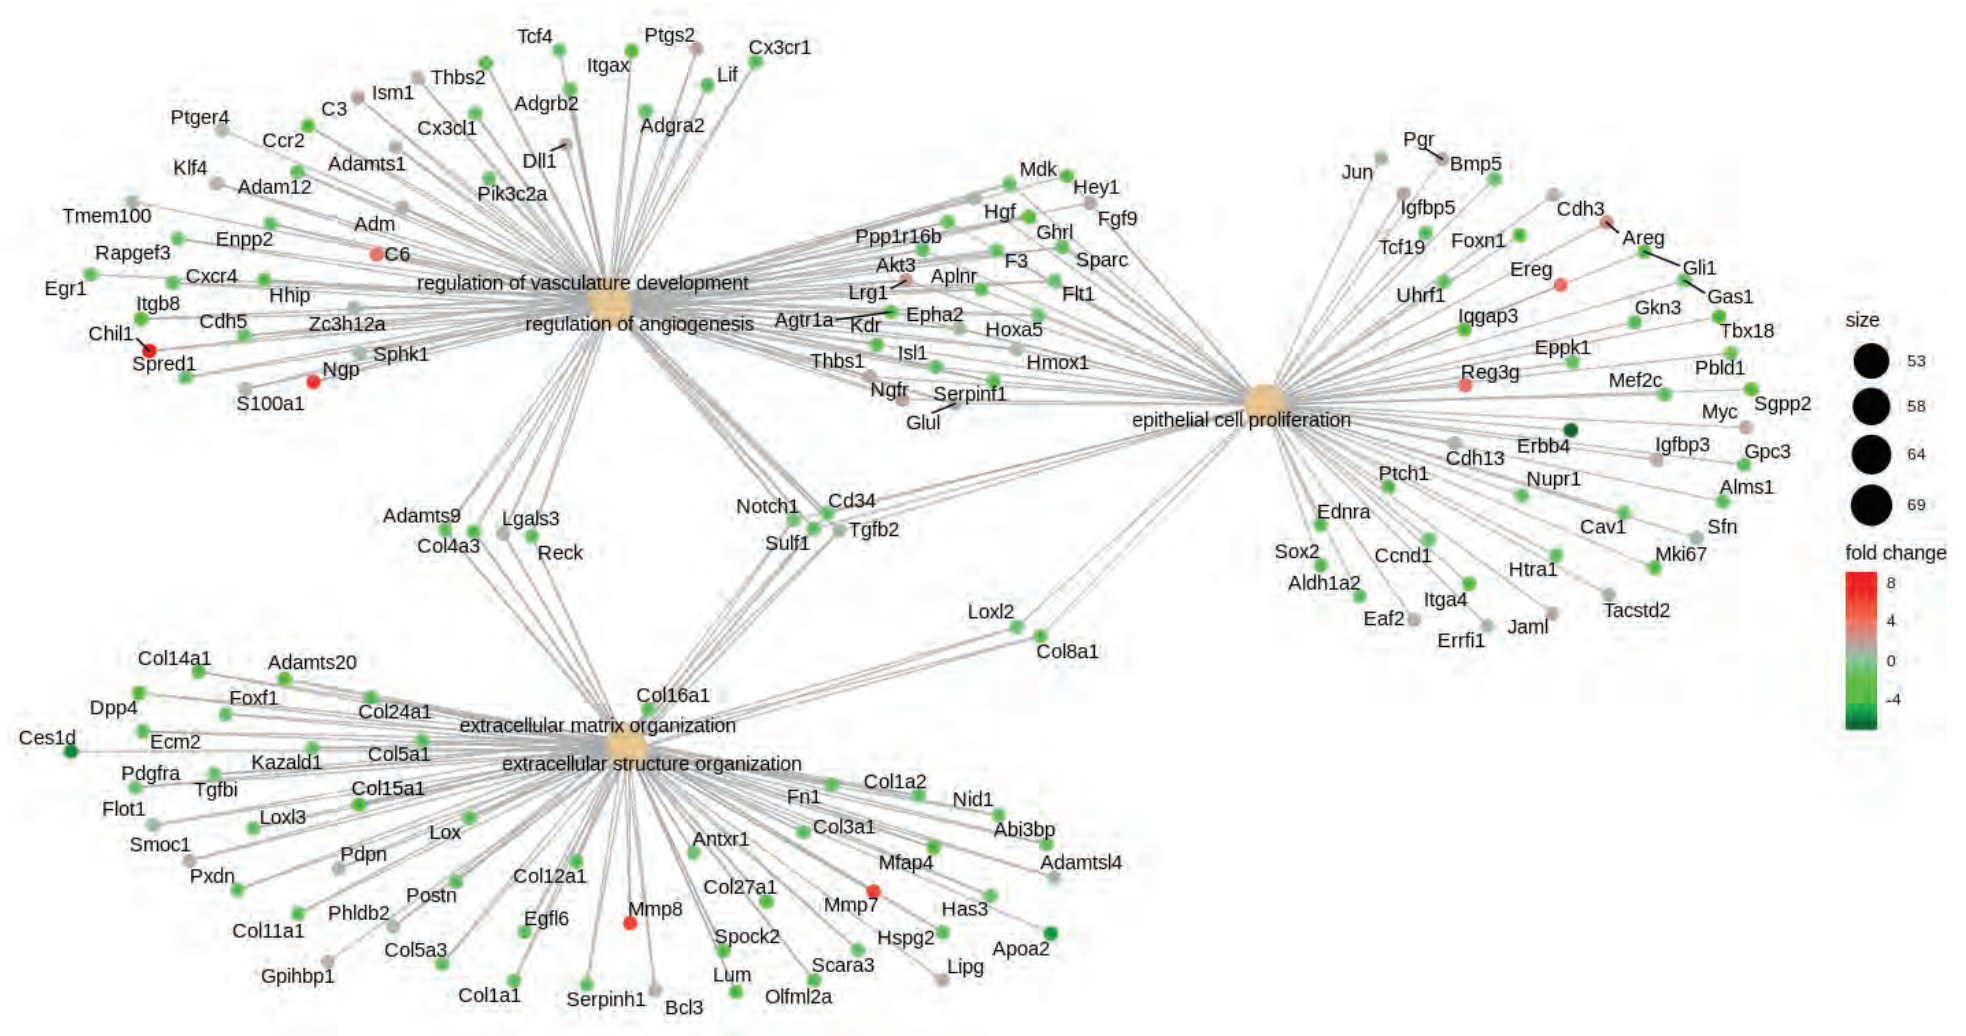

**Supplemental Fig 3. Gene Ontology annotation network.** The plot depicts the linkages of genes amongst the top biological concepts (GO terms) as a network. The size of every biological process is defined by the number of implicated genes. Expression levels of the genes are represented through a continuous scale of green to red color transition. For statistical analysis see Methods section.

## Supplemental Fig 4

A

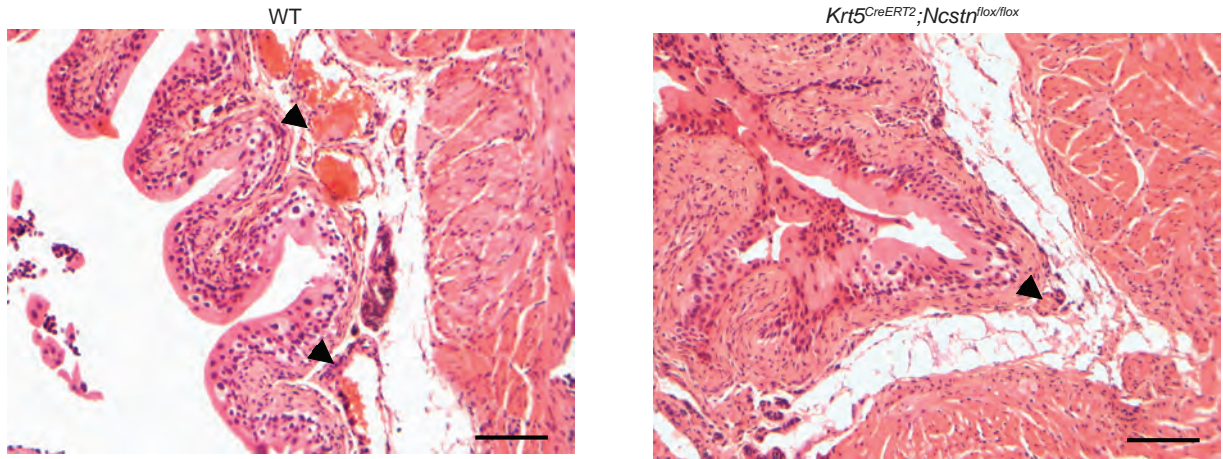

B

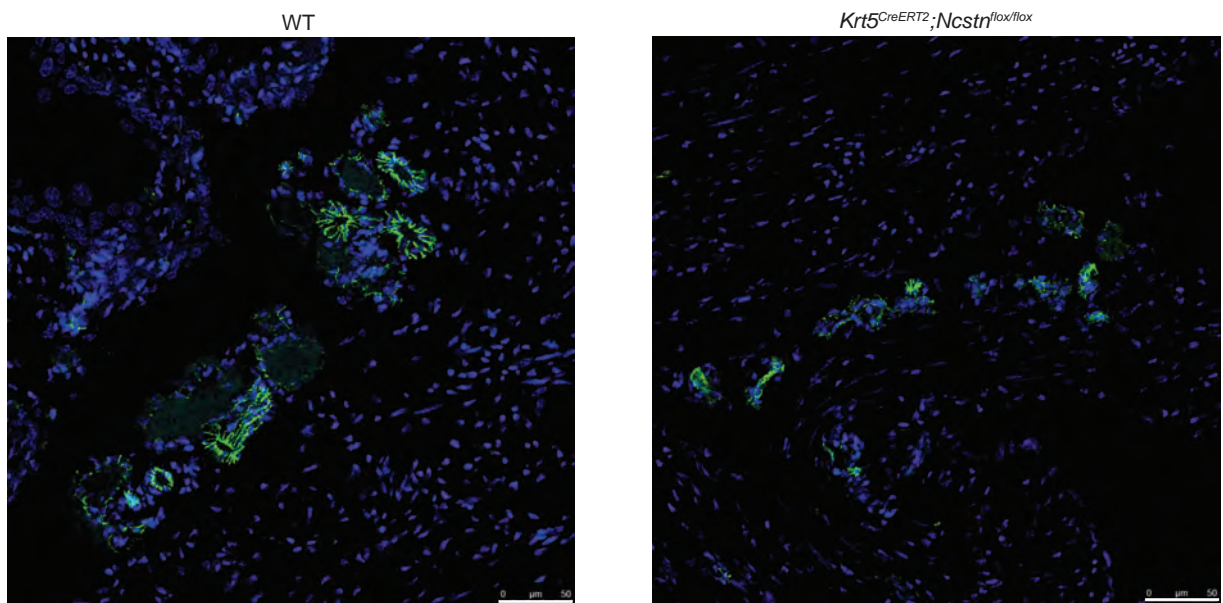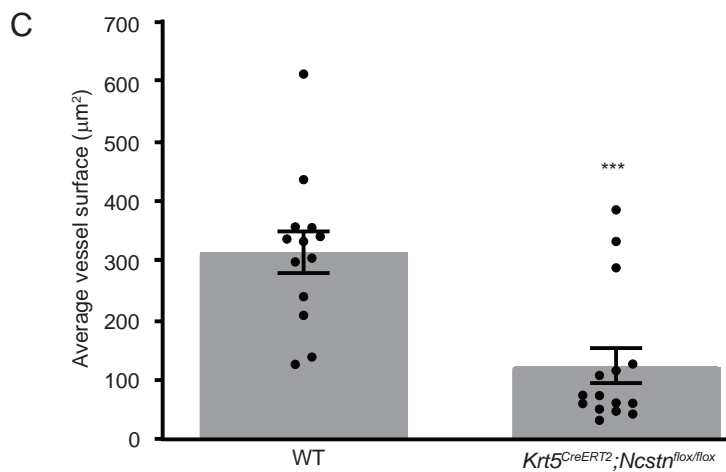

**Supplemental Fig 4. Notch loss leads to blood vessel abnormalities.** (A) Hematoxylin & Eosin staining on bladder tissue from wild-type (WT) and *Krt5<sup>CreERT2</sup>;Ncstn<sup>flox/flox</sup>* mice indicating smaller size blood vessels (arrowheads). Scale bars indicate 100  $\mu\text{m}$ . (B) Immunofluorescence with antibodies against the vascular endothelial cell marker CD31 indicating smaller size vessels with abnormal structure. Scale bars indicate 50  $\mu\text{m}$ . DAPI has been used as nuclear counterstain. (C) Scatter dot plot indicating average blood vessel surface from WT and *Krt5<sup>CreERT2</sup>;Ncstn<sup>flox/flox</sup>* mice. A total of  $n=13$  and  $n=15$  blood vessels respectively, from 3 different mice from each group, were measured with the use of LAS AF 2.6.0 software. \*\*\* indicates  $p < 0.001$ . Student's t test was used.

Supplemental Fig 5

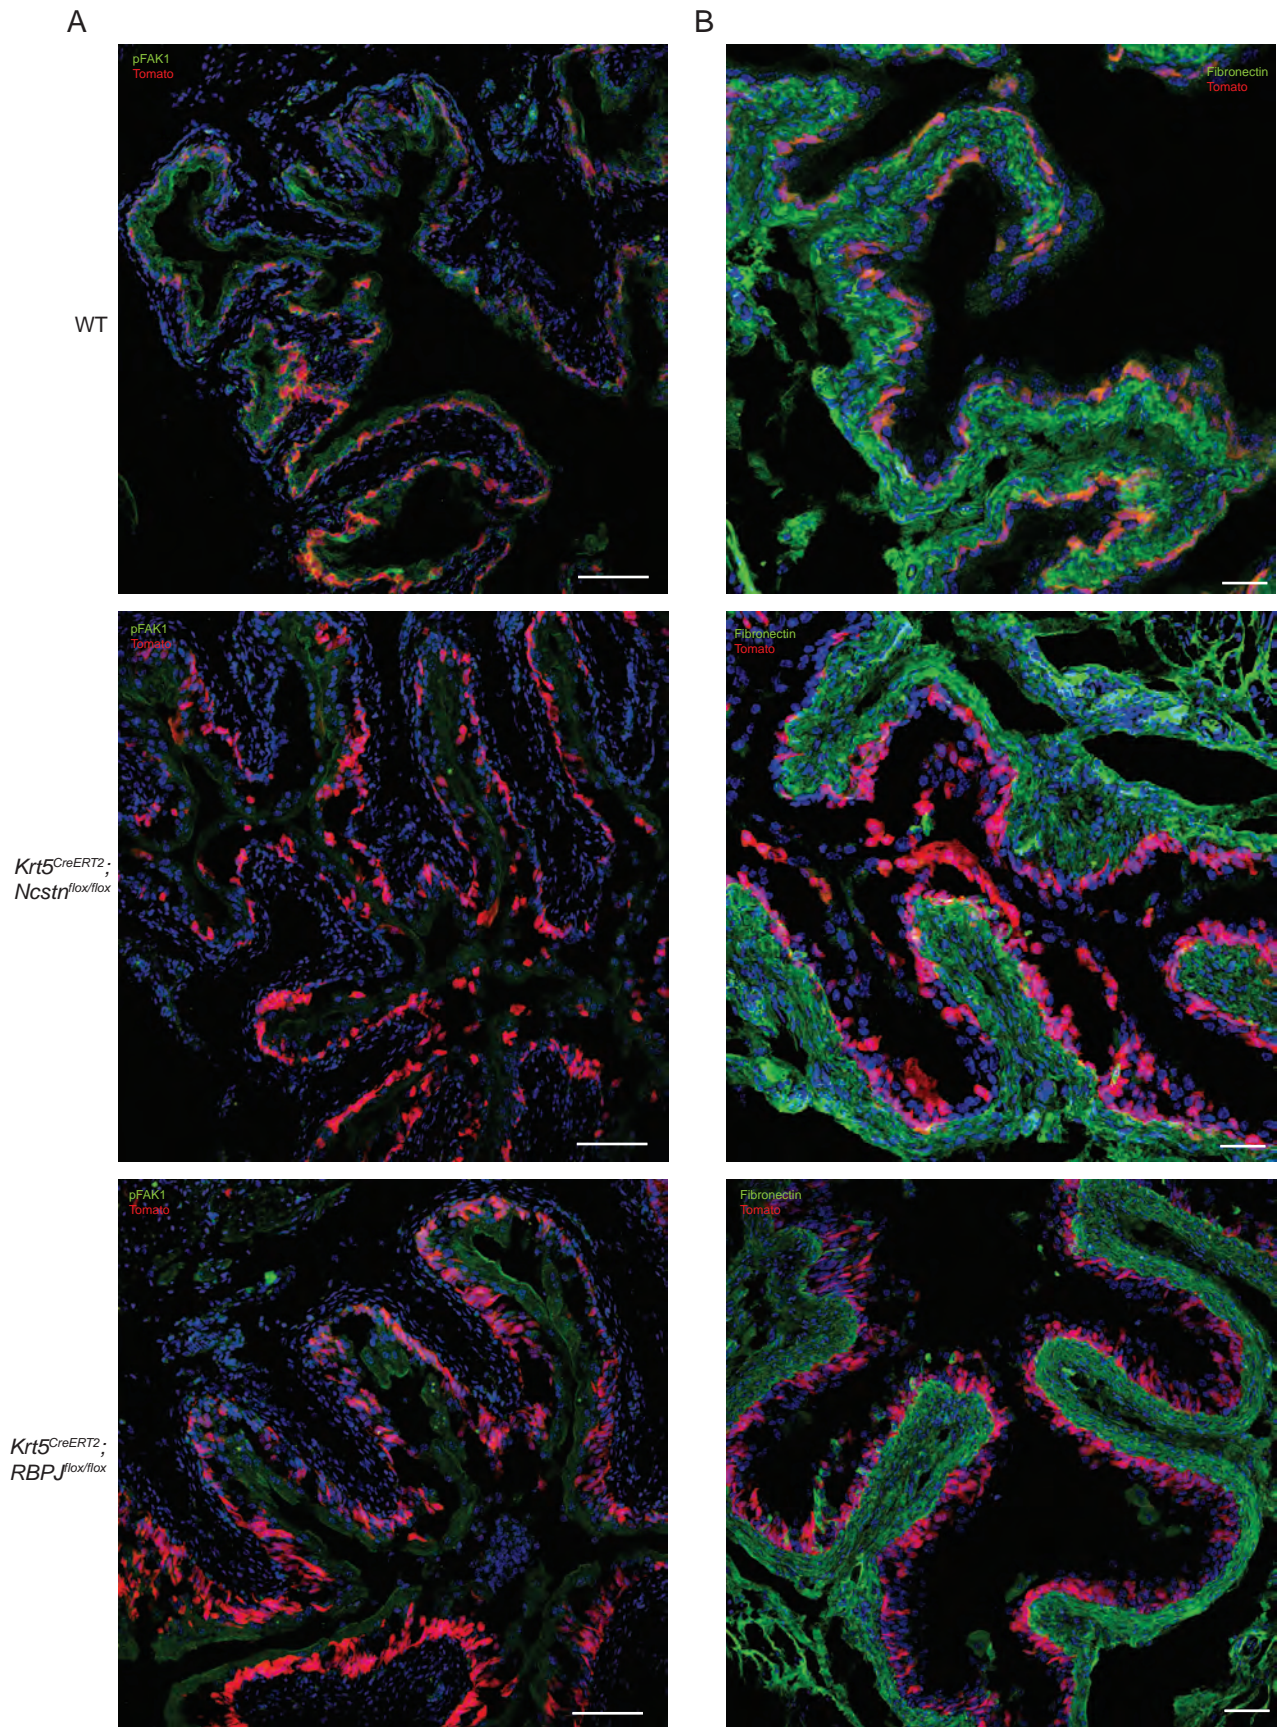

**Supplemental Fig 5. Notch loss leads to downregulation of ECM components and integrin signaling.** Phosphorylated FAK1 (A) and fibronectin (B) immunofluorescence on bladder sections from wild-type and *Krt5<sup>CreERT2</sup>;  
Ncstn<sup>flox/flox</sup>* or *Krt5<sup>CreERT2</sup>;  
RBPJ<sup>flox/flox</sup>* mice. Scale bars indicate 100  $\mu$ m (A) and 50  $\mu$ m (B). DAPI has been used as nuclear counterstain.

**Supplemental Table 1. List of processes affected in Notch KO mouse bladders and IC patients**

| <b>Mouse Notch KO</b>                                         | <b>Human non ulcer area (ni)</b>                              |
|---------------------------------------------------------------|---------------------------------------------------------------|
| Cell adhesion molecules (CAMs)                                | Staphylococcus aureus infection                               |
| Phagosome                                                     | Viral protein interaction with cytokine and cytokine receptor |
| Viral myocarditis                                             | Chemokine signaling pathway                                   |
| Antigen processing and presentation                           | Cytokine-cytokine receptor interaction                        |
| Human T-cell leukemia virus 1 infection                       | Cell adhesion molecules (CAMs)                                |
| Protein digestion and absorption                              | Intestinal immune network for IgA production                  |
| ECM-receptor interaction                                      | Hematopoietic cell lineage                                    |
| Human papillomavirus infection                                | Allograft rejection                                           |
| Graft-versus-host disease                                     | Leishmaniasis                                                 |
| Renin secretion                                               | Type I diabetes mellitus                                      |
| Type I diabetes mellitus                                      | Graft-versus-host disease                                     |
| Cellular senescence                                           | Rheumatoid arthritis                                          |
| Allograft rejection                                           | Th1 and Th2 cell differentiation                              |
| Epstein-Barr virus infection                                  | Viral myocarditis                                             |
| AGE-RAGE signaling pathway in diabetic complications          | Inflammatory bowel disease (IBD)                              |
| Focal adhesion                                                | Th17 cell differentiation                                     |
| Gap junction                                                  | T cell receptor signaling pathway                             |
| Dilated cardiomyopathy (DCM)                                  | Natural killer cell mediated cytotoxicity                     |
| Autoimmune thyroid disease                                    | Epstein-Barr virus infection                                  |
| Metabolism of xenobiotics by cytochrome P450                  | Autoimmune thyroid disease                                    |
| Toxoplasmosis                                                 | B cell receptor signaling pathway                             |
| Inflammatory bowel disease (IBD)                              | Antigen processing and presentation                           |
| MAPK signaling pathway                                        | Asthma                                                        |
| Salivary secretion                                            | NF-kappa B signaling pathway                                  |
| Pentose and glucuronate interconversions                      | Osteoclast differentiation                                    |
| cGMP-PKG signaling pathway                                    | Primary immunodeficiency                                      |
| Human cytomegalovirus infection                               | Phagosome                                                     |
| Small cell lung cancer                                        | Systemic lupus erythematosus                                  |
| Leishmaniasis                                                 | Fc gamma R-mediated phagocytosis                              |
| Tuberculosis                                                  | Toxoplasmosis                                                 |
| Amoebiasis                                                    | Chagas disease (American trypanosomiasis)                     |
| cAMP signaling pathway                                        | Leukocyte transendothelial migration                          |
| Leukocyte transendothelial migration                          | Tuberculosis                                                  |
| Pathways in cancer                                            | Fc epsilon RI signaling pathway                               |
| Colorectal cancer                                             | PD-L1 expression and PD-1 checkpoint pathway in cancer        |
| Cytokine-cytokine receptor interaction                        | Human T-cell leukemia virus 1 infection                       |
| Arrhythmogenic right ventricular cardiomyopathy (ARVC)        | Malaria                                                       |
| Adrenergic signaling in cardiomyocytes                        | TNF signaling pathway                                         |
| Viral protein interaction with cytokine and cytokine receptor | Toll-like receptor signaling pathway                          |
| Drug metabolism - cytochrome P450                             | Complement and coagulation cascades                           |
| PI3K-Akt signaling pathway                                    | Human immunodeficiency virus 1 infection                      |
| Hematopoietic cell lineage                                    | Pertussis                                                     |
| Insulin secretion                                             | Influenza A                                                   |
| Herpes simplex virus 1 infection                              | Rap1 signaling pathway                                        |
| Th1 and Th2 cell differentiation                              | Aldosterone-regulated sodium reabsorption                     |
| Other types of O-glycan biosynthesis                          | Measles                                                       |
| Hypertrophic cardiomyopathy (HCM)                             | Legionellosis                                                 |
| p53 signaling pathway                                         | Platelet activation                                           |
| Aldosterone-regulated sodium reabsorption                     | Glutathione metabolism                                        |
| TNF signaling pathway                                         | Fluid shear stress and atherosclerosis                        |
| Malaria                                                       | Yersinia infection                                            |
| Proteoglycans in cancer                                       | Amoebiasis                                                    |
| Calcium signaling pathway                                     | Transcriptional misregulation in cancer                       |

Th17 cell differentiation  
 ABC transporters  
 Cell cycle  
 Kaposi sarcoma-associated herpesvirus infection  
 Human immunodeficiency virus 1 infection  
 Chronic myeloid leukemia  
 Porphyrin and chlorophyll metabolism  
 Breast cancer  
 Prion diseases

**Human ulcer area (ulcus)**

Staphylococcus aureus infection  
 Viral protein interaction with cytokine and cytokine receptor  
 Cytokine-cytokine receptor interaction  
 Rheumatoid arthritis  
 Hematopoietic cell lineage  
 Cell adhesion molecules (CAMs)  
 Chemokine signaling pathway  
 Intestinal immune network for IgA production  
 Leishmaniasis  
 Type I diabetes mellitus  
 Graft-versus-host disease  
 Allograft rejection  
 Complement and coagulation cascades  
 NF-kappa B signaling pathway  
 Inflammatory bowel disease (IBD)  
 Th17 cell differentiation  
 Asthma  
 Viral myocarditis  
 Th1 and Th2 cell differentiation  
 Leukocyte transendothelial migration  
 Systemic lupus erythematosus  
 Osteoclast differentiation  
 Phagosome  
 AGE-RAGE signaling pathway in diabetic complications  
 Autoimmune thyroid disease  
 Malaria  
 Amoebiasis  
 Fc epsilon RI signaling pathway  
 TNF signaling pathway  
 Fc gamma R-mediated phagocytosis  
 B cell receptor signaling pathway  
 Natural killer cell mediated cytotoxicity  
 Fluid shear stress and atherosclerosis  
 Epstein-Barr virus infection  
 Chagas disease (American trypanosomiasis)  
 Tuberculosis  
 T cell receptor signaling pathway  
 PI3K-Akt signaling pathway  
 Legionellosis  
 Toll-like receptor signaling pathway  
 Aldosterone-regulated sodium reabsorption  
 Primary immunodeficiency  
 Antigen processing and presentation  
 Protein digestion and absorption

**Mouse Notch KO and Human ni and ulcus**

Cell adhesion molecules (CAMs)  
 Phagosome  
 Viral myocarditis  
 Antigen processing and presentation  
 Human T-cell leukemia virus 1 infection  
 Graft-versus-host disease  
 Type I diabetes mellitus  
 Allograft rejection  
 Epstein-Barr virus infection  
 Autoimmune thyroid disease  
 Toxoplasmosis  
 Inflammatory bowel disease (IBD)  
 Leishmaniasis  
 Tuberculosis  
 Amoebiasis  
 Leukocyte transendothelial migration  
 Cytokine-cytokine receptor interaction  
 Viral protein interaction with cytokine and cytokine receptor  
 Hematopoietic cell lineage  
 Th1 and Th2 cell differentiation  
 Aldosterone-regulated sodium reabsorption  
 TNF signaling pathway  
 Malaria  
 Th17 cell differentiation

**[Mouse Notch KO] and [Human ni]:**

Human immunodeficiency virus 1 infection

**[Mouse Notch KO] and [Human ulcus]:**

Protein digestion and absorption  
 ECM-receptor interaction  
 AGE-RAGE signaling pathway in diabetic complications  
 Metabolism of xenobiotics by cytochrome P450  
 MAPK signaling pathway  
 Pentose and glucuronate interconversions  
 Drug metabolism - cytochrome P450  
 PI3K-Akt signaling pathway  
 Proteoglycans in cancer

**[Mouse Notch KO unique]**

Human papillomavirus infection  
 Renin secretion  
 Cellular senescence  
 Focal adhesion

Metabolism of xenobiotics by cytochrome P450  
Chemical carcinogenesis  
Rap1 signaling pathway  
Glutathione metabolism  
Drug metabolism - cytochrome P450  
Ascorbate and aldarate metabolism  
Arachidonic acid metabolism  
MAPK signaling pathway  
Pertussis  
Pentose and glucuronate interconversions  
Steroid hormone biosynthesis  
Influenza A  
Transcriptional misregulation in cancer  
Arginine and proline metabolism  
Toxoplasmosis  
Tryptophan metabolism  
African trypanosomiasis  
Human T-cell leukemia virus 1 infection  
Valine, leucine and isoleucine degradation  
Platelet activation  
VEGF signaling pathway  
Inflammatory mediator regulation of TRP channels  
Carbohydrate digestion and absorption  
Pathogenic Escherichia coli infection  
Drug metabolism - other enzymes  
EGFR tyrosine kinase inhibitor resistance  
Glycosaminoglycan biosynthesis - chondroitin sulfate/dermatan sulfate  
ECM-receptor interaction  
Proteoglycans in cancer  
IL-17 signaling pathway  
TGF-beta signaling pathway  
Antifolate resistance  
PD-L1 expression and PD-1 checkpoint pathway in cancer

Gap junction  
Dilated cardiomyopathy (DCM)  
Salivary secretion  
cGMP-PKG signaling pathway  
Human cytomegalovirus infection  
Small cell lung cancer  
cAMP signaling pathway  
Pathways in cancer  
Colorectal cancer  
Arrhythmogenic right ventricular cardiomyopathy (ARVC)  
Adrenergic signaling in cardiomyocytes  
Insulin secretion  
Herpes simplex virus 1 infection  
Other types of O-glycan biosynthesis  
Hypertrophic cardiomyopathy (HCM)  
p53 signaling pathway  
Calcium signaling pathway  
ABC transporters  
Cell cycle  
Kaposi sarcoma-associated herpesvirus infection  
Chronic myeloid leukemia  
Porphyrin and chlorophyll metabolism  
Breast cancer  
Prion diseases



**Supplemental Table 2: Quantitative PCR Primer sequence**

| <b>Primer Name</b> | <b>Sequences (5' → 3')</b> |
|--------------------|----------------------------|
| Gapdh_F            | CTGCCCAGAACATCATCCCT       |
| Gapdh_R            | ACTTGGCAGGTTTCTCCAGG       |
| Ncstn_F            | AGCCAAGCCCAACTCAACTT       |
| Ncstn_R            | CAAGCCGTTGCCCAGTTCAT       |
| RBPJ_F             | TGGCAACAGCGATGACATTG       |
| RBPJ_R             | TCGTTCTCTGAAGCAATGCAC      |
| Hey1_F             | TGCAGATGACTGTGGATCACC      |
| Hey1_R             | AAACCCCAAACCTCCGATAGTCC    |
| Itga4_F            | GTAGCCGTTGGTGCATTTCA       |
| Itga4_R            | TGTAGCCTGGGACCTCTTTG       |
| Itga9_F            | TTCCTGCCAGGCTCCATCAA       |
| Itga9_R            | CCACATCAGCCGTCAGATTG       |
| Itgb8_F            | GCTTTTCTGACTGCTGCACT       |
| Itgb8_R            | GGCACAGGAGACCACATTTG       |
| Itga1_F            | GGCCAGAAGGGGAGTGAAAA       |
| Itga1_R            | GGGCTCACTTGCGATTGATT       |
| Prlc_F             | TAGCGGTGACGCATGGGCTG       |
| Prlc_R             | CTGCCAGCAGGTCCTCATCA       |
| Bgn_F              | CTCTGACTTGGGTCTGAAGACT     |
| Bgn_R              | TGCTGGAGGCCTTTGAAGTCAT     |
| Dcn_F              | TTCCTACTCGGCTGTGAGTC       |
| Dcn_R              | AAGTTGAATGGCAGAACGC        |
| ZO-1_F             | CCACCTCTGTCCAGCTCTTC       |
| ZO-1_R             | AGTTGGTGGTCTGAAAGTTGCT     |
| Dusp4_F            | CGTGCGCTGCAATACCATC        |
| Dusp4_R            | CTCATAGCCACCTTTAAGCAGG     |
